# Supplementary material
Source: PubMed Central journal article supplement (PMC5820096)
Supplement: NIHMS916910-supplement-FigS1.pdf [file NIHMS916910-supplement-FigS1.pdf]

YUMMER1.7  
Passage 15

chr1:45343979  
G > A

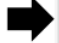

A A G G A

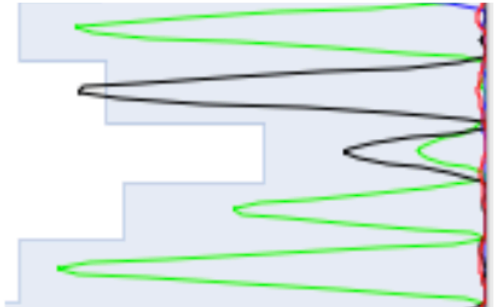

A A G G A

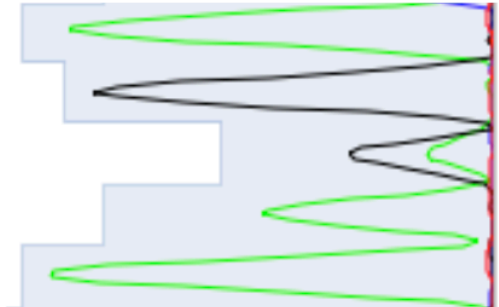

chr8:4736317  
C > T

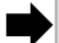

G C C T T

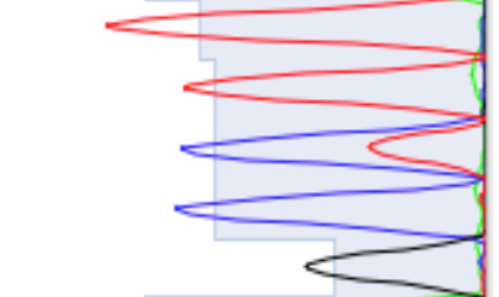

G C C T T

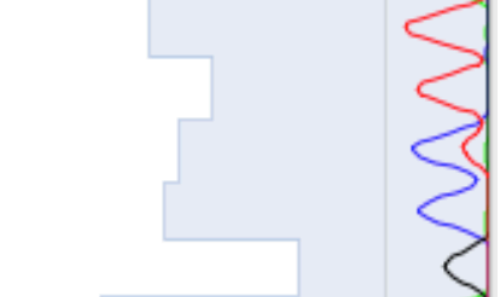

chr8:119954861  
A > T

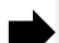

A T A G A

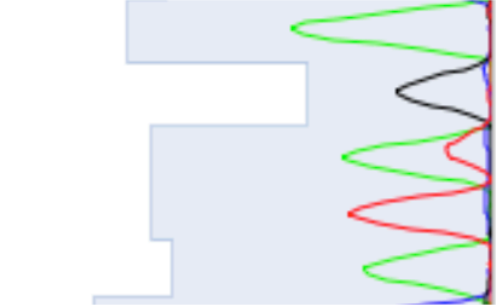

A T A G A

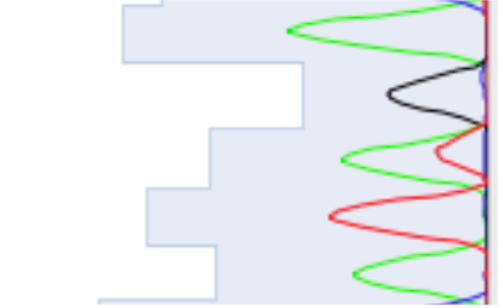

chr11:83764950  
G > A

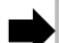

G T G G A

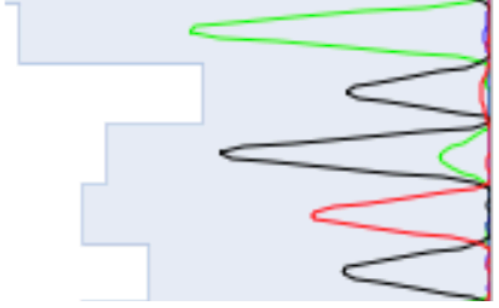

G T G G A

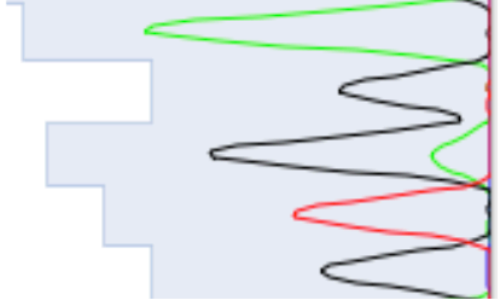

YUMMER1.7  
Passage 25
