# Supplementary material
Source: PubMed Central journal article supplement (PMC5820096)

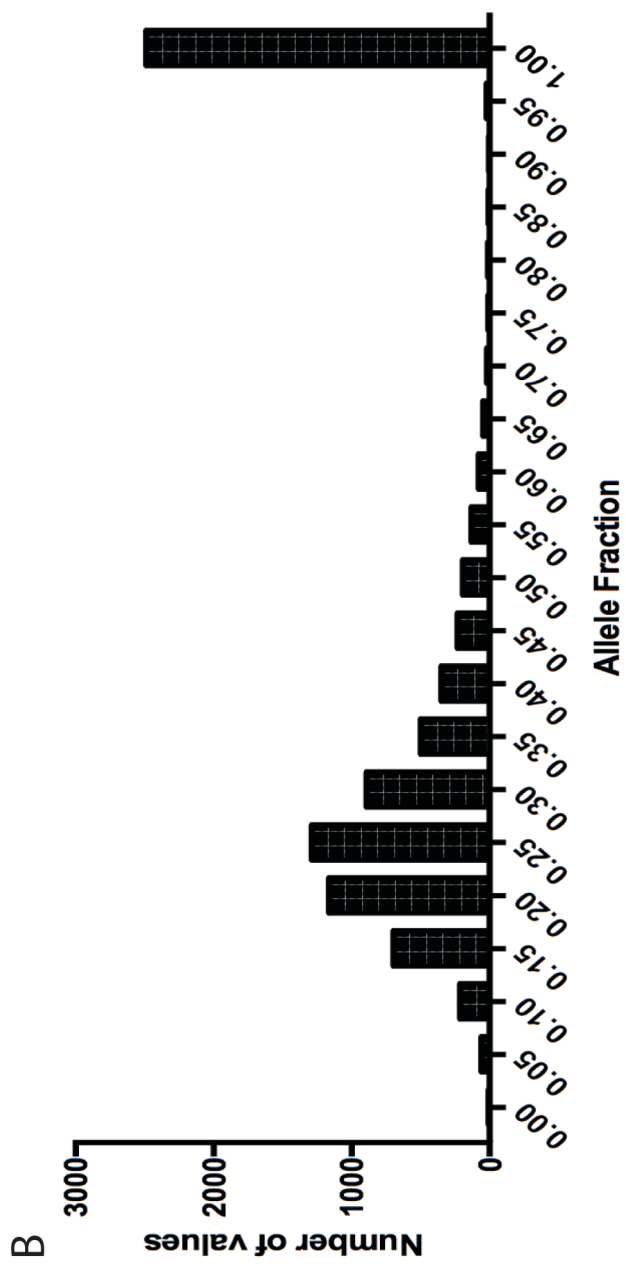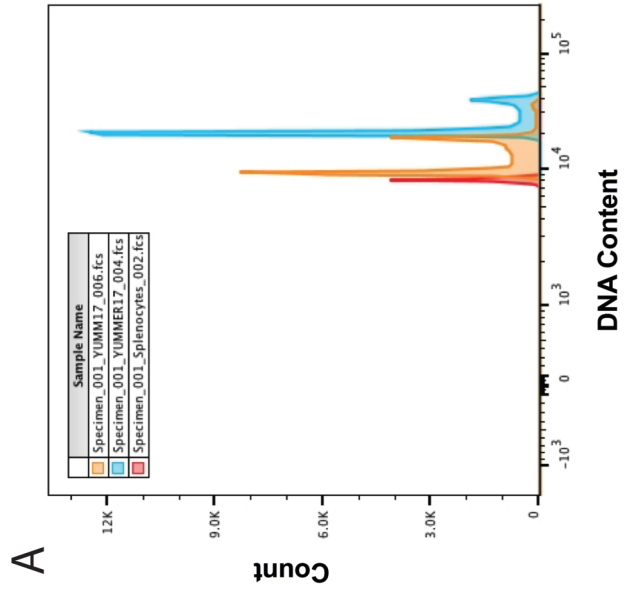

Supplement: NIHMS916910-supplement-FigS2.pdf [file NIHMS916910-supplement-FigS2.pdf]

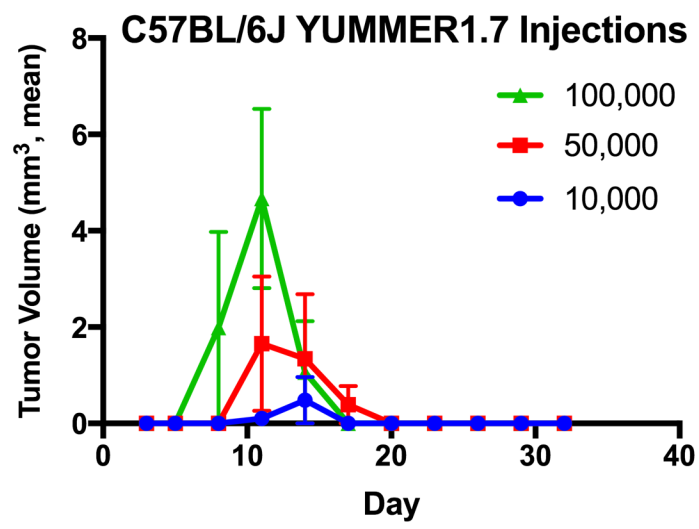

Supplement: NIHMS916910-supplement-FigS3.pdf [file NIHMS916910-supplement-FigS3.pdf]

### Tumor Rechallenge

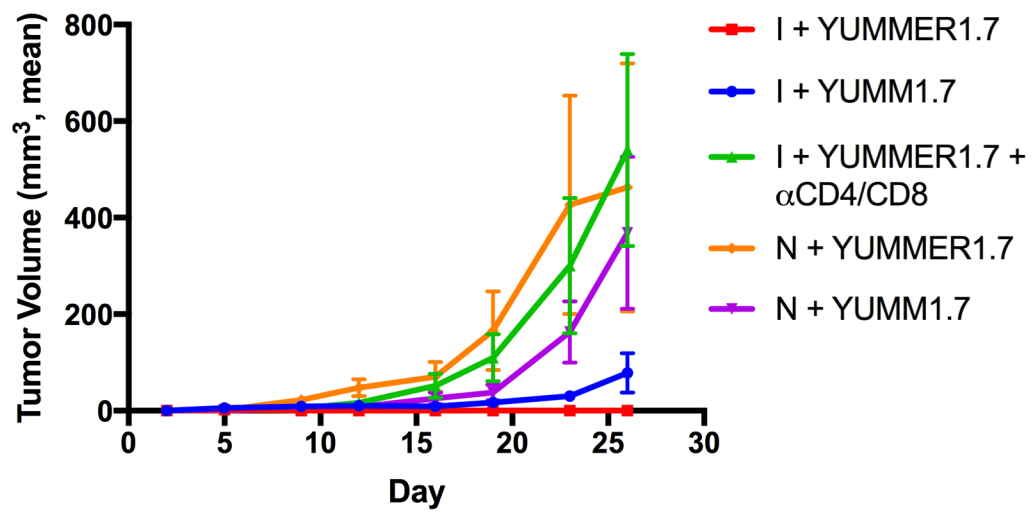

Supplement: NIHMS916910-supplement-FigS4.pdf [file NIHMS916910-supplement-FigS4.pdf]
